# Supplementary material for: A highly sensitive colorimetric chemodosimeter for cyanide anion by Michael addition based on a coumarin derivative
Source: Royal Society of Chemistry journal article supplement (doi:10.1039/c6nj00181e), 2016-01-01
Supplement: c6nj00181e1.pdf [file c6nj00181e1.pdf]

*Electronic Supplementary Material*

*New Journal of Chemistry*

**A highly sensitive colorimetric chemodosimeter for cyanide anion by Michael addition based on coumarin derivative**

Yan-Li Leng <sup>a,b</sup>, Jian-Hui Zhang <sup>b</sup>, Qiao Li <sup>a</sup>, You-Ming Zhang <sup>a</sup>, Qi Lin <sup>a</sup>, Hong Yao

<sup>a</sup>, Tai-Bao Wei<sup>a,\*</sup>

<sup>a</sup> Key Laboratory of Eco-Environment-Related Polymer Materials of Ministry of Education, Gansu Key Laboratory of Polymer Materials, College of Chemistry and Chemical Engineering, Northwest Normal University, Lanzhou, 730070, China

<sup>b</sup> Department of Metallurgical Engineering, Lanzhou Resources & Environment Voc-Tech College, Lanzhou, Gansu, 730021, China

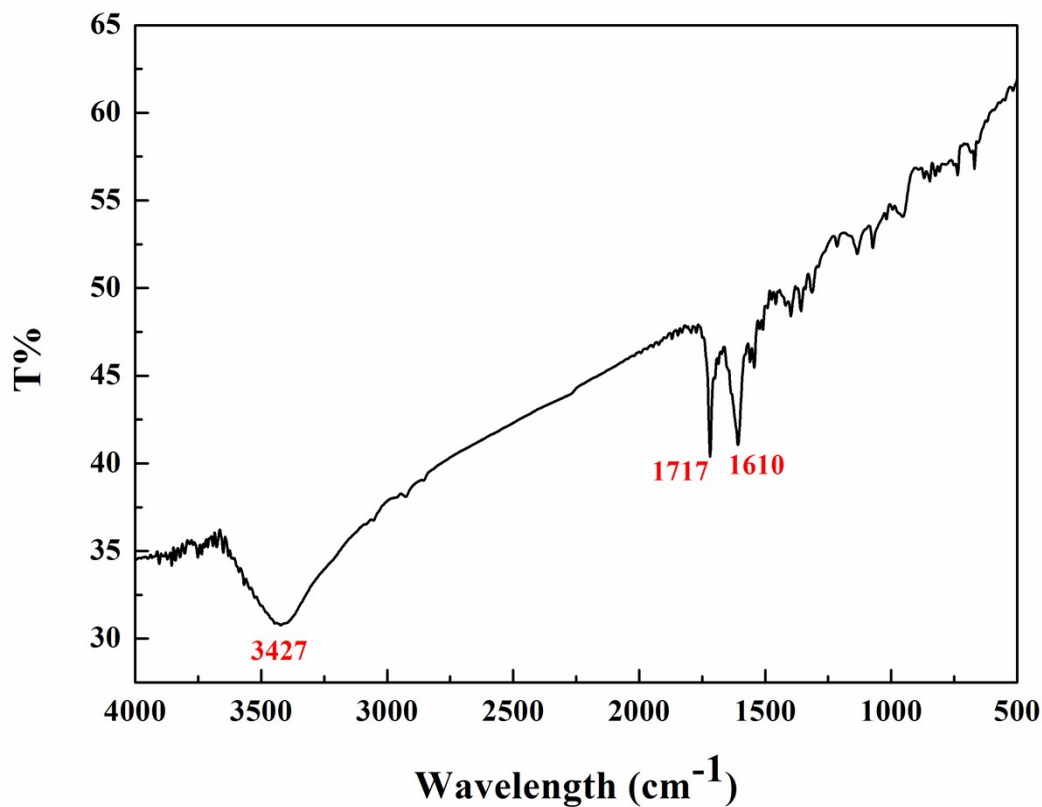

**Fig. S1** FT-IR spectra of powdered L1.

LENGYANLI-XDS1-1H-0625  
STANDARD 1H OBSERVE

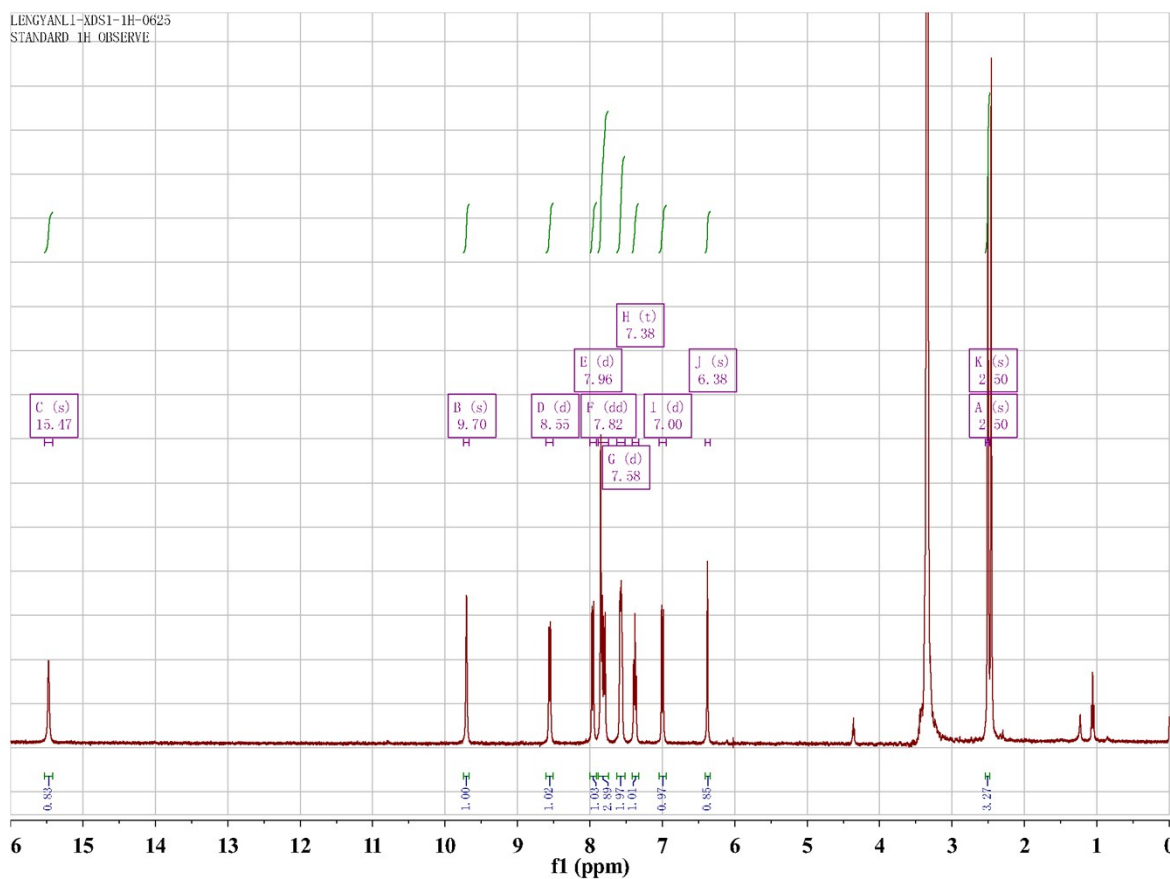

**Fig. S2** Partial  $^1\text{H}$  NMR spectra of L1 (0.05 M,  $\text{DMSO-}d_6$ ).

# Generic Display Report

## Analysis Info

Analysis Name D:\Data\YANGY\New\LENGYANLI150703\_1NEG.d  
Method POS\_100-1000.m  
Sample Name  
Comment

Acquisition Date 7/3/2015 11:15:38 AM

Operator LZU  
Instrument micrOTOF

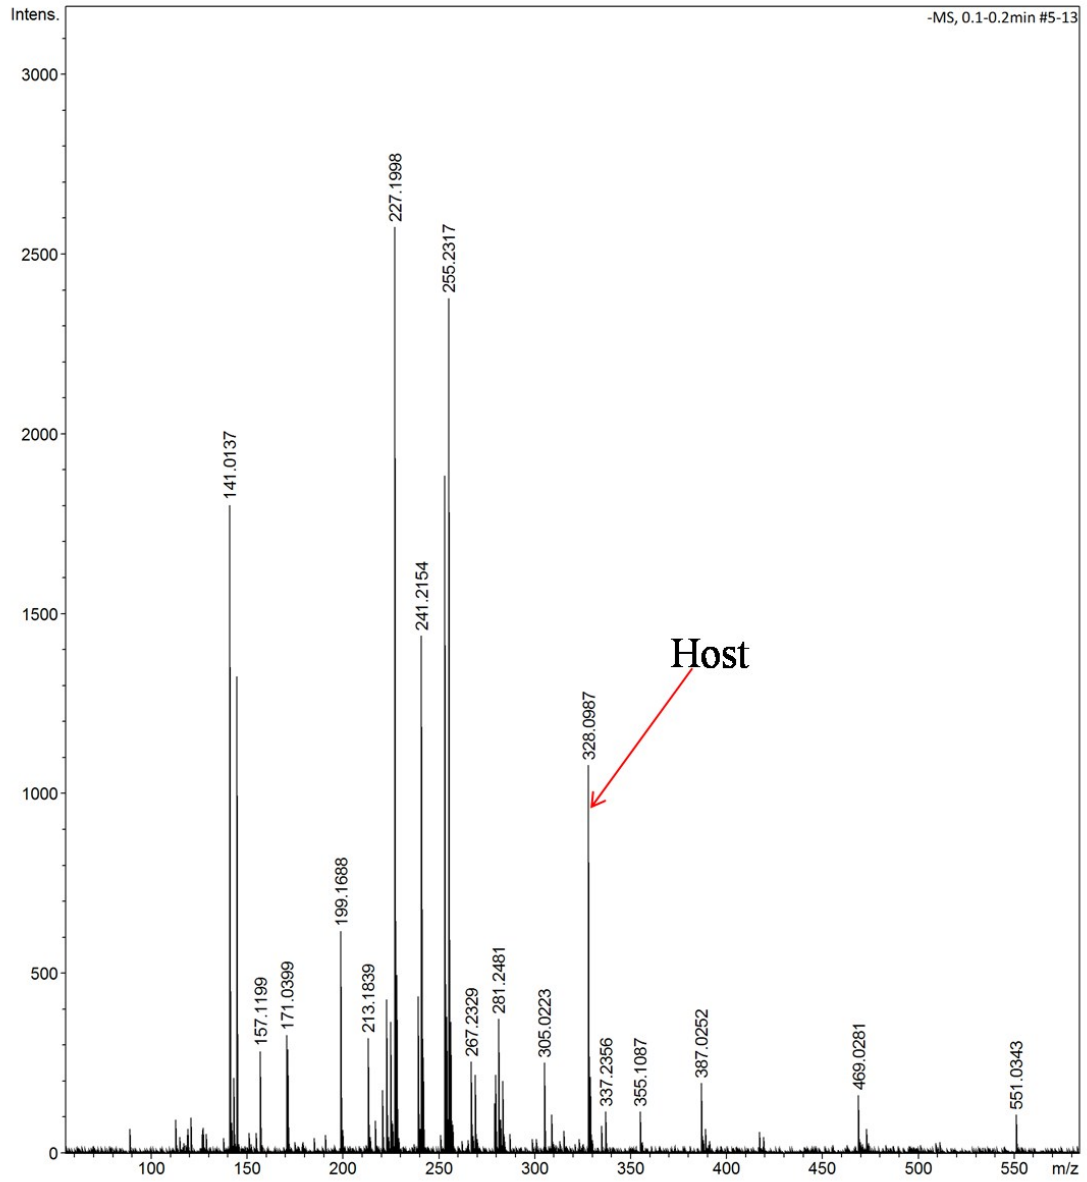

**Fig. S3** ESI-MS spectrum of L1 in DMSO.

# Generic Display Report

## Analysis Info

Analysis Name D:\Data\YANGY\New\LENGYANLI150703\_2NEG.d  
Method POS\_100-1000.m  
Sample Name  
Comment

Acquisition Date 7/3/2015 11:20:28 AM

Operator LZU  
Instrument micrOTOF

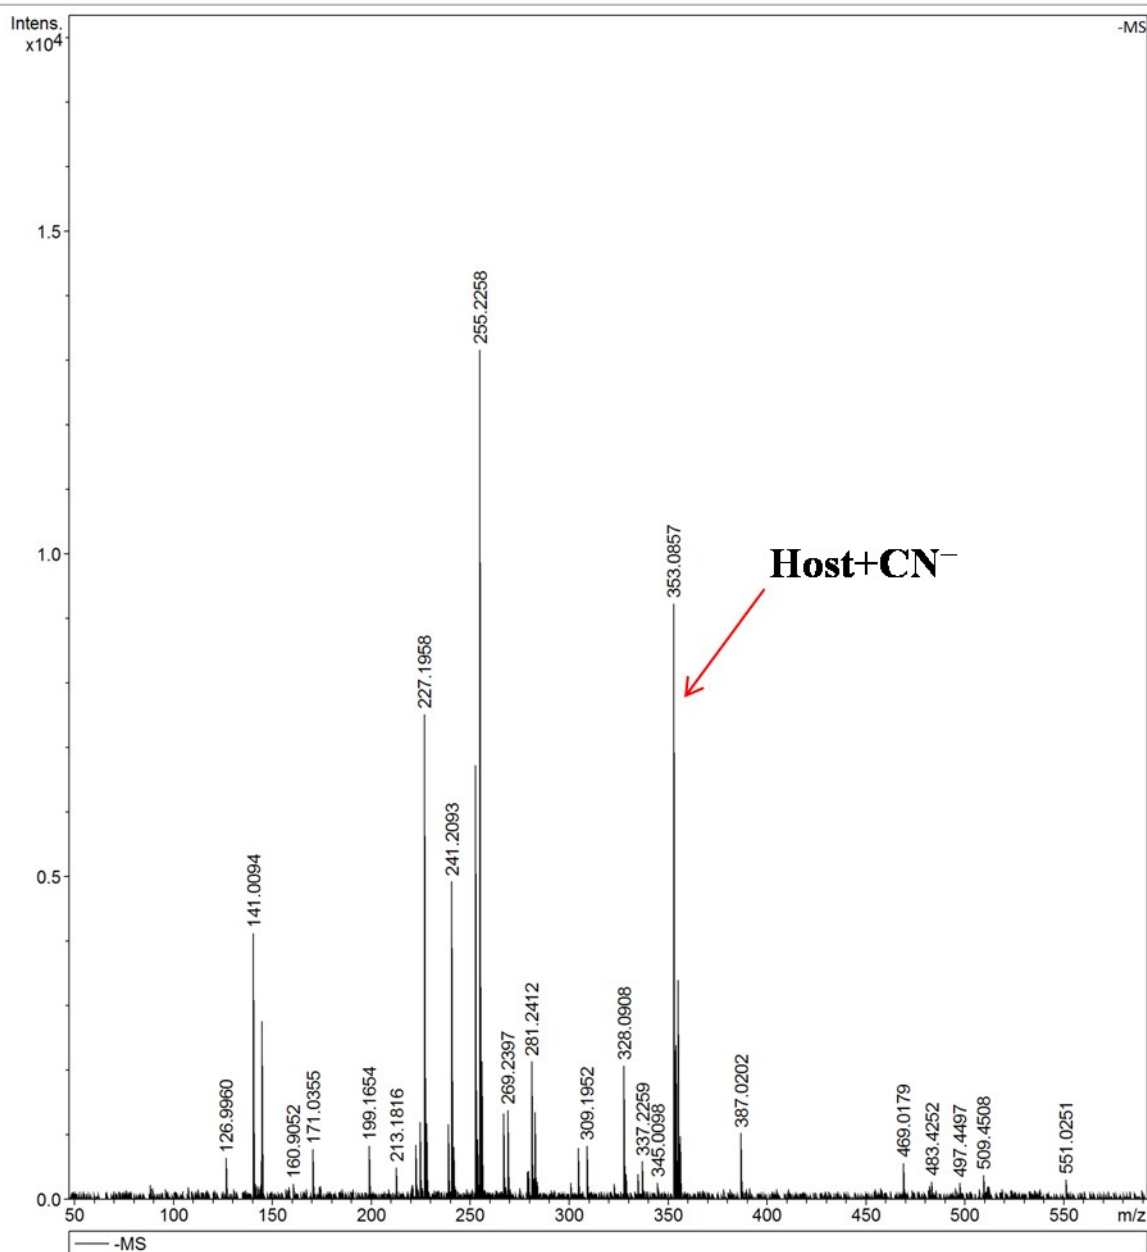

**Fig. S4** ESI-MS spectrum of **L1+CN<sup>-</sup>** in DMSO.

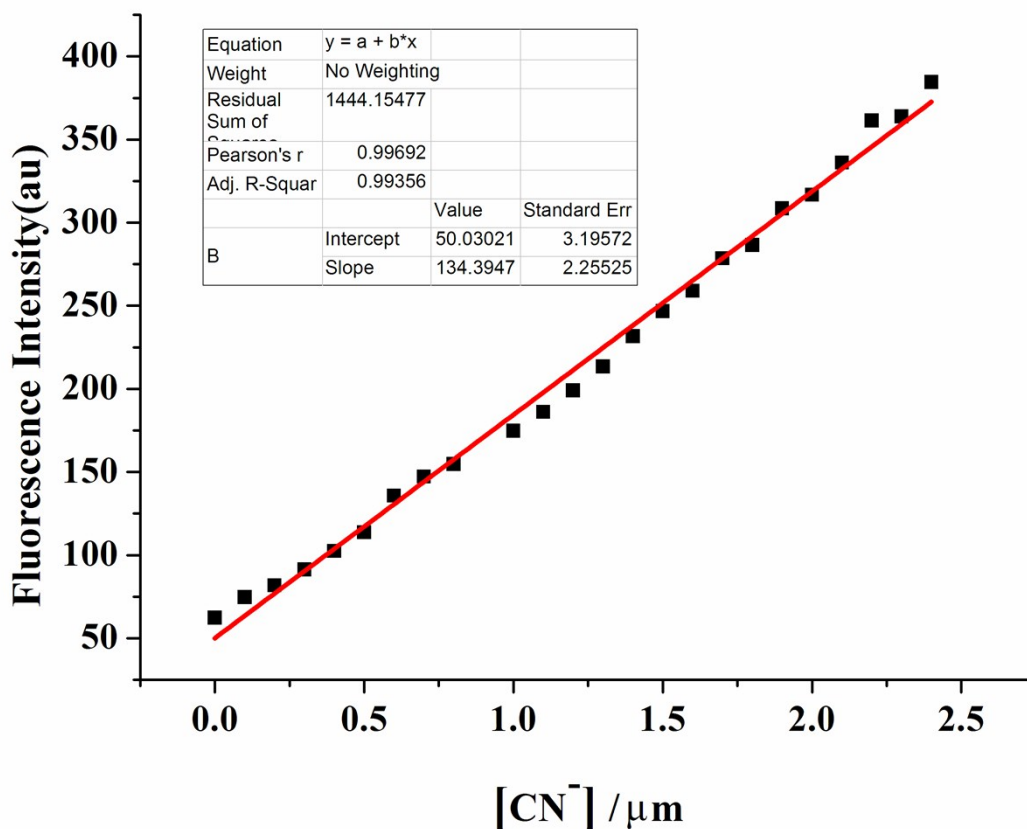

**Figure S5** Plot of the intensity at 426 nm for a mixture of probe **L1** (25.0  $\mu\text{M}$ ) and  $\text{CN}^-$  in DMSO/ $\text{H}_2\text{O}$  (8:2, v/v) solution in the range 0–2.6  $\mu\text{M}$  ( $\lambda_{\text{ex}} = 370 \text{ nm}$ ).

The result of the analysis as follows:

Linear Equation:  $Y = 134.3947 \times X + 50.03021$        $R = 0.9936$

$$S = 134.3947 \times 10^6 \quad \delta = \sqrt{\frac{\sum (F_0 - F_0)^2}{N - 1}} = 3.4600 \text{ (N=10)} \quad K = 3$$

$$\text{LOD} = K \times \delta / S = 7.72 \times 10^{-8} \text{ M}$$

$F_0$  is the fluorescence intensity of **L1**.

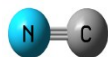

**Fig. S6** Optimized structure of sensor  $\text{CN}^-$ .

Charge = -1 Multiplicity = 1

|   |            |            |             |
|---|------------|------------|-------------|
| C | 0.00000000 | 0.00000000 | -0.63086800 |
| N | 0.00000000 | 0.00000000 | 0.54074400  |

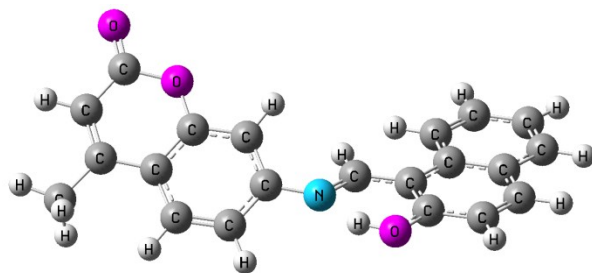

**Fig. S7** Optimized structure of sensor **L1**.

Charge = 0 Multiplicity = 1

|   |             |             |             |
|---|-------------|-------------|-------------|
| C | -3.09860600 | -1.80069200 | -0.46602200 |
| C | -2.63674100 | -0.53454000 | -0.05884800 |
| C | -3.59591800 | 0.52214700  | 0.17043400  |
| C | -4.98232000 | 0.25448400  | -0.03531200 |
| C | -5.38356000 | -1.04350400 | -0.45300300 |
| C | -4.47903600 | -2.04078800 | -0.66068500 |
| H | -2.20839500 | 2.08565600  | 0.76892600  |
| C | -3.24316100 | 1.82659900  | 0.59270600  |
| C | -5.93903700 | 1.27197400  | 0.17831000  |
| H | -6.44041000 | -1.23325500 | -0.60531600 |
| H | -4.78084600 | -3.03117800 | -0.97648200 |
| C | -5.56001900 | 2.52664200  | 0.58577100  |
| C | -4.19665200 | 2.79829000  | 0.79366000  |
| H | -6.98568600 | 1.04079500  | 0.01375700  |
| H | -6.30002100 | 3.30066100  | 0.74711800  |
| H | -3.88906000 | 3.78577000  | 1.11688800  |
| O | -2.27458100 | -2.82568300 | -0.68600700 |
| H | -1.34294900 | -2.50465800 | -0.49881800 |
| C | -1.22425300 | -0.31816900 | 0.11634900  |
| H | -0.89422700 | 0.67452000  | 0.42267300  |

|   |             |             |             |
|---|-------------|-------------|-------------|
| N | -0.34502900 | -1.25179800 | -0.05824400 |
| C | 3.21079600  | -1.80084900 | 0.68662000  |
| C | 3.81168200  | -0.59461400 | 0.28629800  |
| C | 1.85255100  | -2.00241900 | 0.56443700  |
| C | 5.23130800  | -0.31809900 | 0.36845600  |
| C | 2.97279000  | 0.39817000  | -0.24475100 |
| C | 1.02570300  | -0.98761700 | 0.05104100  |
| H | 1.40093000  | -2.93658900 | 0.87222200  |
| C | 5.68451400  | 0.88048900  | -0.06566000 |
| C | 1.60193800  | 0.21210300  | -0.36749800 |
| C | 4.81799600  | 1.90565400  | -0.61410000 |
| H | 6.73371800  | 1.14100300  | -0.02809300 |
| H | 1.01306900  | 0.99657600  | -0.82393100 |
| O | 3.46156100  | 1.59309500  | -0.67880900 |
| O | 5.16105600  | 2.98786700  | -1.01287100 |
| C | 6.17282900  | -1.34718900 | 0.92437600  |
| H | 5.90978100  | -1.60462600 | 1.95395000  |
| H | 6.13319000  | -2.27071200 | 0.34043900  |
| H | 7.19845300  | -0.98067000 | 0.91493800  |
| H | 3.82655300  | -2.59139200 | 1.09545500  |

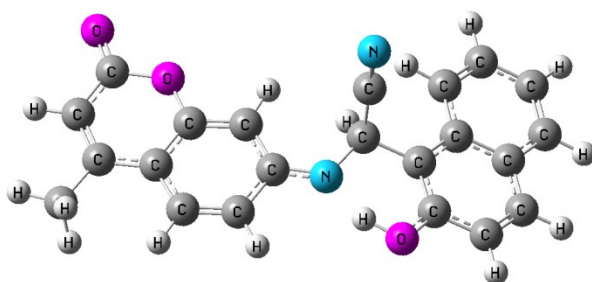

**Fig. S8** Optimized structure of IM.

Charge = -1 Multiplicity = 1

|   |            |             |             |
|---|------------|-------------|-------------|
| C | 2.92308000 | -1.87727400 | 0.01914900  |
| C | 2.57871400 | -0.52728100 | 0.11533400  |
| C | 3.55681900 | 0.46851300  | -0.17665700 |
| C | 4.87778700 | 0.07914000  | -0.57360000 |
| C | 5.18457100 | -1.30249900 | -0.65359000 |
| C | 4.24263400 | -2.24443900 | -0.36824500 |
| H | 2.32188900 | 2.21145300  | 0.23226000  |

|   |             |             |             |
|---|-------------|-------------|-------------|
| C | 3.29458500  | 1.86448100  | -0.08850500 |
| C | 5.84374500  | 1.06619200  | -0.87266600 |
| H | 6.18564100  | -1.60008600 | -0.94933800 |
| H | 4.46129000  | -3.30403500 | -0.42889300 |
| C | 5.54891400  | 2.40462000  | -0.78549700 |
| C | 4.25718900  | 2.79912400  | -0.38483300 |
| H | 6.83490700  | 0.74184600  | -1.17447400 |
| H | 6.29997400  | 3.15114000  | -1.01676600 |
| H | 4.01806200  | 3.85360500  | -0.30338200 |
| O | 2.07020300  | -2.87259500 | 0.26855000  |
| H | 1.13007200  | -2.39485900 | 0.35554400  |
| C | 1.15722700  | -0.11261800 | 0.52205900  |
| H | 0.86329200  | 0.73665200  | -0.11214500 |
| N | 0.22887200  | -1.21216300 | 0.37864000  |
| C | -3.27832700 | -1.95370600 | -0.20957700 |
| C | -3.90231300 | -0.67959400 | -0.22482900 |
| C | -1.93831900 | -2.10001600 | 0.00291600  |
| C | -5.28877900 | -0.44216900 | -0.44304100 |
| C | -3.05770100 | 0.42880600  | 0.00386800  |
| C | -1.07406200 | -0.97065000 | 0.21900300  |
| H | -1.48472000 | -3.08394000 | 0.00458300  |
| C | -5.76543300 | 0.83983500  | -0.43015100 |
| C | -1.70127400 | 0.30748600  | 0.22937300  |
| C | -4.91552600 | 1.97437300  | -0.19964400 |
| H | -6.81137000 | 1.06124200  | -0.59394400 |
| H | -1.14569500 | 1.21276200  | 0.43062100  |
| O | -3.56840400 | 1.70196600  | 0.01651900  |
| O | -5.25438300 | 3.14066700  | -0.17556400 |
| C | -6.23059400 | -1.59167700 | -0.68764900 |
| H | -5.93444700 | -2.16364000 | -1.57158700 |
| H | -6.23267100 | -2.28588800 | 0.15745800  |
| H | -7.24941200 | -1.23326700 | -0.83787000 |
| H | -3.88268100 | -2.83841900 | -0.37417700 |
| C | 1.16797500  | 0.41462200  | 1.92077200  |
| N | 1.16556600  | 0.79837800  | 3.00737900  |



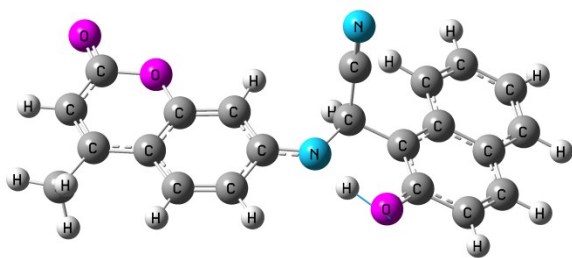

**Fig. S9** Optimized structure of TS.

Charge = -1 Multiplicity = 1

|   |             |             |             |
|---|-------------|-------------|-------------|
| C | 2.86783100  | -1.87745300 | 0.04058200  |
| C | 2.57928100  | -0.50654800 | 0.12159400  |
| C | 3.58617900  | 0.45352600  | -0.17748400 |
| C | 4.89610500  | 0.01715500  | -0.56492600 |
| C | 5.15549300  | -1.37613200 | -0.62973000 |
| C | 4.18309600  | -2.28463900 | -0.34088700 |
| H | 2.40626300  | 2.24181400  | 0.20095100  |
| C | 3.36905500  | 1.85886900  | -0.10981800 |
| C | 5.89398800  | 0.96813800  | -0.87069100 |
| H | 6.14796000  | -1.70886300 | -0.91830500 |
| H | 4.36897500  | -3.35119700 | -0.39189200 |
| C | 5.64329500  | 2.31761300  | -0.80208700 |
| C | 4.36293100  | 2.75821900  | -0.41383200 |
| H | 6.87546600  | 0.60789000  | -1.16384800 |
| H | 6.41950500  | 3.03617200  | -1.03881200 |
| H | 4.15718700  | 3.82096400  | -0.34794300 |
| O | 1.97705400  | -2.81977500 | 0.29103000  |
| H | 0.99061400  | -2.22356400 | 0.37143800  |
| C | 1.16976400  | -0.04694100 | 0.51610200  |
| H | 0.88339100  | 0.78630600  | -0.14175700 |
| N | 0.23187200  | -1.14159100 | 0.39728700  |
| C | -3.26430500 | -1.94757300 | -0.17714400 |
| C | -3.90323300 | -0.68279300 | -0.21161900 |
| C | -1.92112200 | -2.07388500 | 0.03431500  |
| C | -5.29540900 | -0.46756900 | -0.43004900 |
| C | -3.07389300 | 0.44022100  | -0.00544400 |
| C | -1.07728100 | -0.92906800 | 0.22971900  |
| H | -1.45553800 | -3.05187500 | 0.05111900  |
| C | -5.78687900 | 0.80718300  | -0.43849500 |

|   |             |             |             |
|---|-------------|-------------|-------------|
| C | -1.71451700 | 0.33977200  | 0.21800700  |
| C | -4.95025900 | 1.95755500  | -0.23141000 |
| H | -6.83589000 | 1.01322100  | -0.60263600 |
| H | -1.16596200 | 1.25345700  | 0.39924200  |
| O | -3.59945600 | 1.70647000  | -0.01437500 |
| O | -5.30514700 | 3.11840900  | -0.22802500 |
| C | -6.22203400 | -1.63360400 | -0.65080800 |
| H | -5.92153500 | -2.21635500 | -1.52613500 |
| H | -6.21088600 | -2.31316700 | 0.20602200  |
| H | -7.24625600 | -1.29192200 | -0.80269900 |
| H | -3.85741000 | -2.84249800 | -0.32539300 |
| C | 1.17649300  | 0.51623500  | 1.90074600  |
| N | 1.17056200  | 0.93432000  | 2.97439300  |

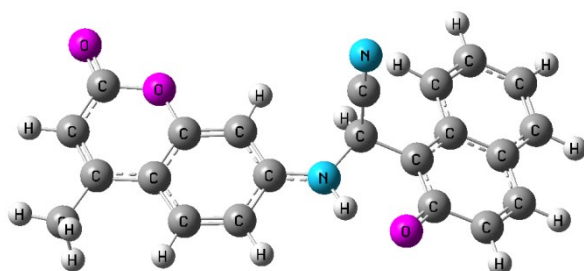

**Fig. S10** Optimized structure of **L1**+**CN<sup>-</sup>**.

Charge = -1 Multiplicity = 1

|   |            |             |             |
|---|------------|-------------|-------------|
| C | 2.94067200 | -1.89716200 | 0.13785200  |
| C | 2.61815400 | -0.50940900 | 0.16568600  |
| C | 3.57516700 | 0.48315700  | -0.17423300 |
| C | 4.88860500 | 0.09066300  | -0.60414800 |
| C | 5.19462800 | -1.29765400 | -0.65454600 |
| C | 4.27768300 | -2.23602000 | -0.30395900 |
| H | 2.37002200 | 2.24943800  | 0.25187200  |
| C | 3.32485500 | 1.88540500  | -0.10560900 |
| C | 5.83895000 | 1.06691900  | -0.95969000 |
| H | 6.18808700 | -1.59574100 | -0.97938100 |
| H | 4.51109600 | -3.29466500 | -0.33659900 |
| C | 5.55247100 | 2.41301000  | -0.89747600 |
| C | 4.27749500 | 2.81377900  | -0.45816100 |
| H | 6.81956000 | 0.73249900  | -1.28621600 |

|   |             |             |             |
|---|-------------|-------------|-------------|
| H | 6.29630900  | 3.15183600  | -1.17245500 |
| H | 4.04044100  | 3.87010600  | -0.38659600 |
| O | 2.13130800  | -2.83755400 | 0.46078300  |
| H | 0.68770400  | -2.04485700 | 0.32493500  |
| C | 1.21433700  | -0.07572900 | 0.57962400  |
| H | 0.95243100  | 0.83153200  | 0.02697400  |
| N | 0.24105000  | -1.10250500 | 0.27021200  |
| C | -3.24627000 | -1.92867200 | -0.35821300 |
| C | -3.89656200 | -0.67549300 | -0.29174300 |
| C | -1.89811500 | -2.05492500 | -0.16004800 |
| C | -5.29856100 | -0.46268200 | -0.48974000 |
| C | -3.08483800 | 0.43828900  | -0.00197900 |
| C | -1.08596600 | -0.91722100 | 0.12292400  |
| H | -1.42051800 | -3.02516700 | -0.22143400 |
| C | -5.80122900 | 0.79949400  | -0.39583900 |
| C | -1.72117200 | 0.33690700  | 0.21095100  |
| C | -4.97596300 | 1.94380800  | -0.10242500 |
| H | -6.85296500 | 1.00745800  | -0.53874800 |
| H | -1.17564900 | 1.23672400  | 0.45716900  |
| O | -3.62129200 | 1.69365900  | 0.08829200  |
| O | -5.34780700 | 3.09262800  | -0.00807900 |
| C | -6.20712400 | -1.62123000 | -0.79960100 |
| H | -5.90204400 | -2.12397400 | -1.72158400 |
| H | -6.17771400 | -2.36818500 | -0.00154500 |
| H | -7.23770200 | -1.28612000 | -0.91720200 |
| H | -3.82808000 | -2.81666400 | -0.57381100 |
| C | 1.16215500  | 0.30083100  | 2.02480400  |
| N | 1.12111000  | 0.60386400  | 3.13551200  |
